# Supplementary material for: Tissue-specific targeting of DNA nanodevices in a multicellular living organism
Source: eLife. 2021 Jul 28;10:e67830. doi: 10.7554/eLife.67830 (PMC8360651; doi:10.7554/eLife.67830)
Supplement: Figure 2—figure supplement 1—source data 1. [file elife-67830-fig2-figsupp1-data1.xlsx]

## Sheet: Sheet1
			LMP1::GFP		GLO-1::GFP
			PCC	Pixel Shift	PCC	Pixel Shift
			0.36	-0.01	0.46	0.12
			0.33	-0.03	0.49	0.01
			0.3	0.03	0.42	0.02
			0.35	0.01	0.61	0.1
			0.49	-0.03	0.23	-0.03
			0.42	0.05	0.38	0.01
			0.41	-0.03	0.35	-0.01
			0.3	0.05	0.4	-0.03
			0.32	-0.01	0.34	0.02
			0.59	0.06	0.29	-0.03
			0.31	0.05
			0.31	0.05
			0.46	0.02
			0.33	-0.01
			0.56	-0.03
