# Supplementary material for: Tissue-specific targeting of DNA nanodevices in a multicellular living organism
Source: eLife. 2021 Jul 28;10:e67830. doi: 10.7554/eLife.67830 (PMC8360651; doi:10.7554/eLife.67830)
Supplement: Figure 2—source data 1. [file elife-67830-fig2-data1.xlsx]

## Sheet: Sheet1
		Buffer	1	0.04109
		gDD38	1.36596	0.05198
		gDD50	1.25919	0.06287
		gDD100	1.34613	0.07376
		gDR50	1.89043	0.08465
		gDR100	2.30562	0.07723
