# Supplementary material for: Tissue-specific targeting of DNA nanodevices in a multicellular living organism
Source: eLife. 2021 Jul 28;10:e67830. doi: 10.7554/eLife.67830 (PMC8360651; doi:10.7554/eLife.67830)
Supplement: Figure 2—source data 2. [file elife-67830-fig2-data2.xlsx]

## Sheet: Sheet1
		Buffer	1	0.04109
		gDD38	1.36596	0.05198
		gDR100D38	1.95149	0.07723
		gDR100D50	1.87169	0.08811
		gDR100D100	1.95086	0.099
