# Supplementary material for: Tissue-specific targeting of DNA nanodevices in a multicellular living organism
Source: eLife. 2021 Jul 28;10:e67830. doi: 10.7554/eLife.67830 (PMC8360651; doi:10.7554/eLife.67830)
Supplement: Figure 2—source data 3. [file elife-67830-fig2-data3.xlsx]

## Sheet: Sheet1
		N2	3.94685	0.11567
		dyf2	4.47918	0.17626
		sid2,dyf2	2.0048	0.06244
		sid1	4.38779	0.11621
		Buffer	1	0.04773
