# Supplementary material for: Tissue-specific targeting of DNA nanodevices in a multicellular living organism
Source: eLife. 2021 Jul 28;10:e67830. doi: 10.7554/eLife.67830 (PMC8360651; doi:10.7554/eLife.67830)
Supplement: Figure 3—figure supplement 1—source data 1. [file elife-67830-fig3-figsupp1-data1.xlsx]

## Sheet: Sheet1
		Round 1	Round 2	Round 3
		0.217	670	2100
