# Supplementary material for: Tissue-specific targeting of DNA nanodevices in a multicellular living organism
Source: eLife. 2021 Jul 28;10:e67830. doi: 10.7554/eLife.67830 (PMC8360651; doi:10.7554/eLife.67830)
Supplement: Figure 3—figure supplement 2—source data 1. [file elife-67830-fig3-figsupp2-data1.xlsx]

## Sheet: Sheet1
		dsDNA		R1		R2		RM
	R2-1D	1		0.64262	0.43055	0.13172	0.03316	0.13149	0.01478
	R2-3C	1		1.42842	0.16409	0.08725	0.02291	0.10639	0.00413
	R2-5D	1		1.3793	0.135	0.09167	0.02446	0.15375	0.04495
	R3-1E	1		1.16718	0.35114	0.14613	0.02378	0.11443	0.02013
	R3-2D	1		1.07009	0.26836	0.15915	0.0251	0.12134	0.01926
	R3-2F	1		1.01286	0.23318	0.11165	0.02382	0.08429	0.01311
	R3-3B	1		0.75329	0.21386	0.11125	0.02184	0.08887	0.00957
	R3-3F	1		1.00998	0.30157	0.11311	0.0158	0.09041	0.01074
