# Supplementary material for: Tissue-specific targeting of DNA nanodevices in a multicellular living organism
Source: eLife. 2021 Jul 28;10:e67830. doi: 10.7554/eLife.67830 (PMC8360651; doi:10.7554/eLife.67830)
Supplement: Figure 3—figure supplement 2—source data 2. [file elife-67830-fig3-figsupp2-data2.xlsx]

## Sheet: Sheet1
		RO3		R1		R3		R4		R5
	R2-1D	1		0.66704	0.44691	0.04678	0.00476	0.0923	0.04705	0.07562	0.03542
	R2-3C	1		1.52417	0.17509	0.03387	0.0009061	0.07073	0.03459	0.05765	0.02213
	R2-5D	1		1.32251	0.12945	0.03317	0.000551666	0.24529	0.05848	0.05949	0.02646
	R3-1E	1		1.17739	0.35421	0.04036	0.00114	0.07256	0.02888	0.06672	0.02421
	R3-2D	1		1.34441	0.33715	0.06686	0.00234	0.11143	0.02937	0.09235	0.02291
	R3-2F	1		1.10411	0.25418	0.03689	0.00052051	0.26753	0.19783	0.25078	0.18576
	R3-3B	1		0.82696	0.23477	0.0391	0.00132	0.0661	0.02244	0.05864	0.01582
	R3-3F	1		1.10207	0.32906	0.0343	0.00201	0.07012	0.02836	0.05861	0.02402
