# Supplementary material for: Tissue-specific targeting of DNA nanodevices in a multicellular living organism
Source: eLife. 2021 Jul 28;10:e67830. doi: 10.7554/eLife.67830 (PMC8360651; doi:10.7554/eLife.67830)
Supplement: Figure 3—figure supplement 2—source data 3. [file elife-67830-fig3-figsupp2-data3.xlsx]

## Sheet: Sheet1
		dsDNA		R6
	R2-1D	1		0.03253	0.00318
	R2-3C	1		0.03316	0.00296
	R2-5D	1		0.03913	0.00157
	R3-1E	1		0.05443	0.00249
	R3-2D	1		0.03321	0.000879885
	R3-2F	1		0.03775	0.000548289
	R3-3B	1		0.03511	0.000983515
	R3-3F
