# Supplementary material for: Tissue-specific targeting of DNA nanodevices in a multicellular living organism
Source: eLife. 2021 Jul 28;10:e67830. doi: 10.7554/eLife.67830 (PMC8360651; doi:10.7554/eLife.67830)
Supplement: Figure 3—figure supplement 3—source data 1. [file elife-67830-fig3-figsupp3-data1.xlsx]

## Sheet: Sheet1
						Independent Variable	Boltzmann Fit
	dsDNA (uM)	Normalized Absorbance	s.e.m			Fitted Curves Plot	Fitted Curves Plot
	0	0.0346	0.00114			0.01	0.10035
	0.01	0.10226	0.00337			0.01065	0.10673
	0.025	0.33105	0.01058			0.01134	0.11388
	0.05	0.88988	0.03545			0.01207	0.12189
	0.75	0.95481	0.01986			0.01285	0.13091
	0.1	0.99126	0.05913			0.01369	0.14107
	0.25	0.99422	0.05687			0.01457	0.15255
	0.5	0.93638	0.00511			0.01552	0.16553
	1	1	0.02751			0.01652	0.18022
	2.5	1.05832	0.01347			0.01759	0.19688
	5	1.07074	0.03347			0.01873	0.21577
						0.01995	0.23717
						0.02124	0.26138
						0.02262	0.2887
						0.02408	0.3194
						0.02564	0.35368
						0.0273	0.39165
						0.02907	0.43325
						0.03095	0.47821
						0.03296	0.52597
						0.0351	0.5757
						0.03737	0.62624
						0.03979	0.67624
						0.04237	0.72422
						0.04511	0.76878
						0.04804	0.80875
						0.05115	0.84335
						0.05446	0.87225
						0.05799	0.89552
						0.06175	0.91361
						0.06575	0.9272
						0.07001	0.93706
						0.07454	0.94398
						0.07937	0.94867
						0.08451	0.95175
						0.08999	0.9537
						0.09582	0.95489
						0.10202	0.95559
						0.10863	0.95599
						0.11567	0.95621
						0.12317	0.95632
						0.13115	0.95637
						0.13964	0.9564
						0.14869	0.95641
						0.15832	0.95642
						0.16858	0.95642
						0.1795	0.95642
						0.19113	0.95642
						0.20351	0.95642
						0.2167	0.95642
						0.23074	0.95642
						0.24568	0.95642
						0.2616	0.95642
						0.27855	0.95642
						0.2966	0.95642
						0.31581	0.95642
						0.33627	0.95642
						0.35806	0.95642
						0.38125	0.95642
						0.40595	0.95642
						0.43225	0.95642
						0.46026	0.95642
						0.49008	0.95642
						0.52183	0.95642
						0.55563	0.95642
						0.59163	0.95642
						0.62996	0.95642
						0.67077	0.95642
						0.71423	0.95642
						0.7605	0.95642
						0.80977	0.95642
						0.86223	0.95642
						0.91809	0.95642
						0.97757	0.95642
						1.04091	0.95642
						1.10834	0.95642
						1.18015	0.95642
						1.25661	0.95642
						1.33802	0.95642
						1.4247	0.95642
						1.517	0.95642
						1.61528	0.95642
						1.71993	0.95642
						1.83136	0.95642
						1.95	0.95642
						2.07634	0.95642
						2.21085	0.95642
						2.35408	0.95642
						2.5066	0.95642
						2.66899	0.95642
						2.8419	0.95642
						3.02602	0.95642
						3.22206	0.95642
						3.43081	0.95642
						3.65307	0.95642
						3.88974	0.95642
						4.14174	0.95642
						4.41007	0.95642
						4.69578	0.95642
						5	0.95642
