# Supplementary material for: Tissue-specific targeting of DNA nanodevices in a multicellular living organism
Source: eLife. 2021 Jul 28;10:e67830. doi: 10.7554/eLife.67830 (PMC8360651; doi:10.7554/eLife.67830)
Supplement: Figure 3—figure supplement 3—source data 2. [file elife-67830-fig3-figsupp3-data2.xlsx]

## Sheet: Sheet1
						Independent Variable	ExponentialFit
	Competitor DNA (uM)	Normalized Absorbance	s.e.m			Fit Curve 1	Fit Curve 1
	0	1	0.11143			0	0.83114
	0.001	0.8939	0.02298			0.25253	0.7206
	0.005	0.84824	0.02792			0.50505	0.63988
	0.01	0.80575	0.03079			0.75758	0.58093
	0.025	0.79493	0.02396			1.0101	0.53789
	0.05	0.77646	0.01592			1.26263	0.50647
	0.075	0.78464	0.016			1.51515	0.48352
	0.1	0.85036	0.01911			1.76768	0.46676
	0.15	0.98126	0.08511			2.0202	0.45452
	0.25	0.80311	0.1044			2.27273	0.44559
	0.3	0.63288	0.01522			2.52525	0.43907
	0.5	0.65769	0.01897			2.77778	0.4343
	0.75	0.60412	0.02499			3.0303	0.43082
	1	0.68804	0.03944			3.28283	0.42828
	5	0.5479	0.04329			3.53535	0.42643
	10	0.43257	0.0257			3.78788	0.42507
	25	0.39984	0.01363			4.0404	0.42409
	--	--	--			4.29293	0.42336
	--	--	--			4.54545	0.42284
	--	--	--			4.79798	0.42245
	--	--	--			5.05051	0.42217
	--	--	--			5.30303	0.42196
	--	--	--			5.55556	0.42181
	--	--	--			5.80808	0.4217
	--	--	--			6.06061	0.42162
	--	--	--			6.31313	0.42157
	--	--	--			6.56566	0.42152
	--	--	--			6.81818	0.42149
	--	--	--			7.07071	0.42147
	--	--	--			7.32323	0.42145
	--					7.57576	0.42144
	--					7.82828	0.42143
	--					8.08081	0.42143
	--					8.33333	0.42142
	--					8.58586	0.42142
	--					8.83838	0.42142
	--					9.09091	0.42141
	--					9.34343	0.42141
	--					9.59596	0.42141
	--					9.84848	0.42141
	--					10.101	0.42141
	--					10.3535	0.42141
	--					10.6061	0.42141
	--					10.8586	0.42141
	--					11.1111	0.42141
	--					11.3636	0.42141
	--					11.6162	0.42141
	--					11.8687	0.42141
	--					12.1212	0.42141
	--					12.3737	0.42141
	--					12.6263	0.42141
	--					12.8788	0.42141
	--					13.1313	0.42141
	--					13.3838	0.42141
	--					13.6364	0.42141
	--					13.8889	0.42141
	--					14.1414	0.42141
	--					14.3939	0.42141
	--					14.6465	0.42141
	--					14.899	0.42141
	--					15.1515	0.42141
	--					15.404	0.42141
	--					15.6566	0.42141
	--					15.9091	0.42141
	--					16.1616	0.42141
	--					16.4141	0.42141
	--					16.6667	0.42141
	--					16.9192	0.42141
	--					17.1717	0.42141
	--					17.4242	0.42141
	--					17.6768	0.42141
	--					17.9293	0.42141
	--					18.1818	0.42141
	--					18.4343	0.42141
	--					18.6869	0.42141
	--					18.9394	0.42141
	--					19.1919	0.42141
	--					19.4444	0.42141
	--					19.697	0.42141
	--					19.9495	0.42141
	--					20.202	0.42141
	--					20.4546	0.42141
	--					20.7071	0.42141
	--					20.9596	0.42141
	--					21.2121	0.42141
	--					21.4646	0.42141
	--					21.7172	0.42141
	--					21.9697	0.42141
	--					22.2222	0.42141
	--					22.4748	0.42141
	--					22.7273	0.42141
	--					22.9798	0.42141
	--					23.2323	0.42141
	--					23.4849	0.42141
	--					23.7374	0.42141
	--					23.9899	0.42141
	--					24.2424	0.42141
	--					24.4949	0.42141
	--					24.7475	0.42141
	--					25	0.42141
	--
	--
	--
	--
	--
	--
	--
	--
	--
	--
	--
	--
	--
	--
	--
	--
	--
	--
	--
	--
	--
	--
	--
	--
	--
	--
	--
	--
	--
	--
	--
	--
	--
	--
	--
	--
	--
	--
	--
	--
	--
	--
	--
	--
	--
	--
	--
	--
	--
	--
	--
	--
	--
	--
	--
	--
	--
	--
	--
	--
	--
	--
	--
	--
	--
	--
	--
	--
	--
	--
	--
