# Supplementary material for: Tissue-specific targeting of DNA nanodevices in a multicellular living organism
Source: eLife. 2021 Jul 28;10:e67830. doi: 10.7554/eLife.67830 (PMC8360651; doi:10.7554/eLife.67830)
Supplement: Figure 3—source data 1. [file elife-67830-fig3-data1.xlsx]

## Sheet: Sheet1
		Absorbance	SEM
	dsDNA	1	0
	R1	1.52365	0.40756
	R2	0.10659	0.01116
	RM	0.10215	0.01287
	R3	0.06312	0.02494
	R6	0.04127	0.00297
