# Supplementary material for: Tissue-specific targeting of DNA nanodevices in a multicellular living organism
Source: eLife. 2021 Jul 28;10:e67830. doi: 10.7554/eLife.67830 (PMC8360651; doi:10.7554/eLife.67830)
Supplement: Figure 3—source data 2. [file elife-67830-fig3-data2.xlsx]

## Sheet: Sheet1
	pH	Percentage Binding	SEM
	5	85.6878	0.81056
	5.5	80.2053	3.57568
	6	83.4133	3.06938
	6.5	88.1479	2.65817
	7	100	9.28319
