# Supplementary material for: Tissue-specific targeting of DNA nanodevices in a multicellular living organism
Source: eLife. 2021 Jul 28;10:e67830. doi: 10.7554/eLife.67830 (PMC8360651; doi:10.7554/eLife.67830)
Supplement: Figure 3—source data 3. [file elife-67830-fig3-data3.xlsx]

## Sheet: Sheet1
							Fit	Logistic Fit
	9E (uM)	Mean	SEM				0.001	0.08504
	0	0.06601	0.00542				0.00109	0.08518
	0.001	0.07831	0.00215				0.00119	0.08533
	0.005	0.15865	0.00619				0.00129	0.0855
	0.01	0.27536	0.01679				0.00141	0.08569
	0.05	0.24555	0.00734				0.00154	0.08591
	0.075	0.27617	0.00664				0.00168	0.08614
	0.1	0.40699	0.00883				0.00183	0.08641
	0.15	0.47674	0.04721				0.00199	0.0867
	0.25	0.719	0.04873				0.00217	0.08703
	0.3	0.76142	0.01292				0.00236	0.0874
	0.5	0.89575	0.07272				0.00258	0.0878
	0.75	1.01014	0.01573				0.00281	0.08826
	1	1	0.01776				0.00306	0.08877
	2.5	1.135	0.02598				0.00333	0.08933
	5	1.13584	0.00429				0.00363	0.08996
	--	--	--				0.00396	0.09067
	--	--	--				0.00432	0.09145
	--	--	--				0.0047	0.09232
	--	--	--				0.00513	0.0933
	--	--	--				0.00559	0.09438
	--	--	--				0.00609	0.09559
	--	--	--				0.00664	0.09693
	--	--	--				0.00723	0.09842
	--	--	--				0.00788	0.10009
	--	--	--				0.00859	0.10194
	--	--	--				0.00936	0.10399
	--	--	--				0.0102	0.10628
	--	--	--				0.01112	0.10882
	--	--	--				0.01212	0.11164
	--						0.01321	0.11477
	--						0.0144	0.11824
	--						0.01569	0.12208
	--						0.0171	0.12634
	--						0.01864	0.13105
	--						0.02031	0.13625
	--						0.02214	0.142
	--						0.02412	0.14834
	--						0.02629	0.15532
	--						0.02865	0.16299
	--						0.03123	0.17142
	--						0.03403	0.18066
	--						0.03709	0.19076
	--						0.04042	0.2018
	--						0.04405	0.21382
	--						0.04801	0.22688
	--						0.05233	0.24103
	--						0.05703	0.25633
	--						0.06215	0.27281
	--						0.06773	0.2905
	--						0.07382	0.30942
	--						0.08045	0.32958
	--						0.08768	0.35098
	--						0.09556	0.37358
	--						0.10414	0.39735
	--						0.1135	0.42223
	--						0.12369	0.44814
	--						0.13481	0.47497
	--						0.14692	0.50261
	--						0.16012	0.53092
	--						0.1745	0.55974
	--						0.19018	0.58893
	--						0.20727	0.6183
	--						0.22589	0.64767
	--						0.24618	0.67688
	--						0.2683	0.70575
	--						0.2924	0.73412
	--						0.31867	0.76183
	--						0.3473	0.78874
	--						0.3785	0.81474
	--						0.41251	0.83973
	--						0.44957	0.86361
	--						0.48996	0.88633
	--						0.53398	0.90785
	--						0.58195	0.92813
	--						0.63423	0.94717
	--						0.69122	0.96498
	--						0.75332	0.98158
	--						0.82099	0.99699
	--						0.89475	1.01125
	--						0.97514	1.02442
	--						1.06275	1.03653
	--						1.15823	1.04766
	--						1.26228	1.05786
	--						1.37569	1.06718
	--						1.49928	1.07568
	--						1.63398	1.08343
	--						1.78078	1.09047
	--						1.94077	1.09687
	--						2.11513	1.10267
	--						2.30515	1.10793
	--						2.51225	1.11268
	--						2.73796	1.11698
	--						2.98394	1.12087
	--						3.25202	1.12437
	--						3.54419	1.12753
	--						3.8626	1.13038
	--						4.20962	1.13295
	--						4.58782	1.13526
	--						5	1.13733
	--
	--
	--
	--
	--
	--
	--
	--
	--
	--
	--
	--
	--
	--
	--
	--
	--
	--
	--
	--
	--
	--
	--
	--
	--
	--
	--
	--
	--
	--
	--
	--
	--
	--
	--
	--
	--
	--
	--
	--
	--
	--
	--
	--
	--
	--
	--
	--
	--
	--
	--
	--
	--
	--
	--
	--
	--
	--
	--
	--
	--
	--
	--
	--
	--
	--
	--
	--
	--
	--
	--
