# Supplementary material for: Tissue-specific targeting of DNA nanodevices in a multicellular living organism
Source: eLife. 2021 Jul 28;10:e67830. doi: 10.7554/eLife.67830 (PMC8360651; doi:10.7554/eLife.67830)
Supplement: Figure 4—figure supplement 2—source data 1. [file elife-67830-fig4-figsupp2-data1.xlsx]

## Sheet: Sheet1
rab3	1	2	3	4	5	6	7	8			nD647	1	2	3	4	5	6	7	8
0	0.04	0	0	0	0	0	0	0	--	--	--	7.52688e-05	-4.21941e-06	6.27907e-05	4.47653e-05	5.38813e-05	0.01453	0.06969	-2.59259e-06	--
0.07107	0.000918131	0.000608219	0.01373	0	0	0	0	0.00858	--	--	--	-1.39785e-05	-0.05733	-0.02247	-0.06249	0.0044	0.01379	0.07287	-0.01389	--
0.14215	0	0	0.00177	0	0	0	0	0.01352	--	--	--	0.06969	-0.04511	-0.01161	-0.05826	0.00382	0.01424	0.07412	-0.01571	--
0.21322	0	0	0	0	0	0	0.03322	0.00186	--	--	--	0.0562	-0.05453	-0.01717	-0.06313	-0.00112	0.01563	0.06873	0.02829	--
0.2843	0	0	0	0	0	0	0.0043	0	--	--	--	0.01595	-0.0514	-0.02392	-0.06446	-5.11416e-05	0.0163	0.07366	-0.01888	--
0.35537	0	0	0.03025	0.0256	0	0	0.01015	0	--	--	--	-0.00431	-0.05346	-0.04431	-0.06457	0.01426	0.01476	0.0901	-0.02003	--
0.42645	0.0193	0	0.00406	0.0103	0.02485	0	0.00408	0	--	--	--	-0.00948	-0.044	0.07328	-0.05907	-0.00211	0.01438	0.09542	-0.02313	--
0.49752	0.01191	0	0	0.06209	0.00232	0.29126	0	0	--	--	--	-0.01672	-0.05658	0.48318	-0.03308	-0.00423	0.01474	0.11696	-0.00572	--
0.5686	0	0	0	0.02023	0	0.07624	0.03597	0	--	--	--	-0.00261	-0.04246	0.14396	-0.04971	0.0109	0.01466	0.08883	-0.0191	--
0.63967	0.0084	0	0	0	0.01649	0	0.00939	0				0.00715	-0.01626	0.04002	-0.04531	0.00212	0.0143	0.07	-0.02229
0.71074	0.00613	0.04944	0.01261	0	0.00404	0	0	0.00788				0.06222	-0.03996	0.00887	-0.03144	0.00072968	0.01471	0.08352	-0.02607
0.78182	0	0.10103	0.00417	0	0	0	0	0.000895606				0.000501075	-0.0562	0.10883	-0.04721	-0.00149	0.01752	0.07595	-0.02293
0.85289	0.00281	0.07061	0.03271	0.07022	0	0	0.00855	0.00292				0.07324	-0.04286	0.04494	-0.04494	-0.00166	0.01592	0.07131	-0.02329
0.92397	0	0.01628	0.02621	0.03072	0.01515	0	0.01343	0.01356				0.10365	-0.04199	-0.01266	-0.05474	-0.00117	0.01836	0.07078	-0.03116
0.99504	0	0	0.01678	0	0.02366	0.08245	0	0.01048				0.10046	-0.04541	0.0066	-0.06019	0.00271	0.02051	0.08543	-0.02396
1.06612	0	0	0	0.000767502	0.000275862	0.00382	0	0				0.01208	-0.02775	0.01118	0.02198	0.00452	0.01713	0.08862	-0.02273
1.13719	0.00995	0	0	0	0.00704	0	0	0				0.02024	-0.0364	-0.00575	0.01133	0.00976	0.0146	0.08681	-0.02836
1.20826	0.00908	0	0	0	0	0	0	0				0.1283	-0.0518	0.02783	-0.02612	0.03384	0.01753	0.08017	0.00133
1.27934	0.00492	0	0	0	0.01924	0	0.00351	0				0.06776	-0.05084	0.08959	-0.01911	0.02796	0.02106	0.06908	0.01568
1.35041	0	0	0.02066	0.03581	0.03186	0	0.00102	0				-0.01148	-0.05544	0.01775	-0.05455	0.07658	0.02286	0.07835	-0.01098
1.42149	0	0	0.02293	0.05058	0	0	0	0				0.00764	-0.04754	0.01151	-0.05645	0.07896	0.02049	0.08891	-0.00174
1.49256	0.0058	0	0.01541	0.03509	0	0	0	0.00484				0.03407	-0.05441	0.05775	-0.05202	0.00705	0.03366	0.0748	-0.01214
1.56364	0.0168	0	0.01141	0.02438	0	0	0	0.00358				0.09822	-0.0551	0.09935	-0.05799	0.02817	0.07316	0.07408	0.01801
1.63471	0.02561	0.01836	0.01582	0.09324	0.00943	0	0	0				0.0547	-0.04225	0.0047	-0.05856	0.05412	0.18366	0.07571	-0.0227
1.70579	0	0.0458	0.04746	0.06061	0.03816	0	0.00856	0				0.12239	0.01371	0.09745	-0.06234	0.00719	0.39563	0.08401	0.00376
1.77686	0.0055	0.02058	0	0.11237	0.04717	0.11401	0.01539	0.00663				0.01365	0.05555	0.01796	-0.04506	0.0445	0.66416	0.11155	0.03062
1.84793	0.00603	0	0.03348	0.07514	0.01639	0.42345	0.00751	0.03329				0.12245	0.22377	-0.00316	0.02234	0.1581	0.90206	0.21057	0.04593
1.91901	0.0103	0.01063	0.14299	0.06557	0.06905	0.0451	0.03888	0.0388				0.28815	0.37556	0.03168	0.15741	0.31166	1.00038	0.18123	0.24757
1.99008	0.04698	0	0.03993	0.14856	0.23056	0.21511	0.06583	0.09192				0.21295	0.45507	0.30166	0.38889	0.60208	0.91579	0.35555	0.30396
2.06116	0.06449	0.00483	0.20035	0.04671	0.39404	0.33883	0.01058	0.19606				0.37161	0.42933	0.09787	0.45268	0.74806	0.58801	0.42931	0.84291
2.13223	0.20736	0.06656	0.50086	0.54437	0.96683	0.33764	0.10442	0.16894				0.42241	0.55602	0.00283	0.67659	0.87483	0.40431	0.42179	0.74539
2.20331	0.40344	0.01744	0.51083	0.52775	0.89233	0.35266	0.2476	0.62616				0.50243	0.77041	0.1426	0.84128	0.82252	0.21273	0.61472	0.63476
2.27438	0.58187	0.05479	0.98404	0.92135	0.98698	0.43485	0.20812	0.85151				0.22588	0.87763	0.1396	0.55239	0.70325	0.12766	1.0006	0.42361
2.34546	1.00015	0.01926	0.89889	1.21271	1.00025	0.20962	0.68736	0.99581				0.70015	0.83056	0.00635	0.33919	0.62593	0.08408	0.61883	0.50573
2.41653	0.83307	0.0732	1.00031	1.00074	0.5116	0.02538	0.71785	1.00012				0.05674	0.52178	0.13387	0.31261	0.2166	0.0784	0.60647	0.29381
2.4876	0.51943	0.05763	0.5434	0.75796	0.3018	1.00209	1.00016	0.71454				0.3392	0.47716	0.05953	0.08862	0.03987	0.07474	0.30958	0.11143
2.55868	0.2503	0.05986	0.11788	0.46073	0.03497	0.23381	0.84431	0.41939				0.09845	0.40252	0.08019	-0.04725	0.0013	0.05084	0.21324	0.01819
2.62975	0.0761	0.01455	0.01717	0.27061	0	0.10998	0.61824	0.15542				-0.00258	0.11551	0.00524	-0.04142	0.02001	0.02685	0.14046	-0.00614
2.70083	0.05897	0.05717	0.0014	0.0415	0.000661858	0.04582	0.1976	0.04059				0.04166	0.03221	-0.0043	-0.04298	0.000916895	0.01562	0.12009	-0.00395
2.7719	0.04105	0.01027	0.02671	0.03883	0	0.04097	0.05762	0.03464				0.0195	0.0195	0.00148	-0.05354	0.01087	0.01684	0.11181	-0.01424
2.84298	0.01	0	0.005	0.12938	0.01765	0	0.00684	0.00834				0.04141	-0.03178	0.07928	-0.04869	0.01218	0.029	0.08214	-0.02735
2.91405	0	0	0.0042	0.06846	0.00943	0	0	0				0.0448	-0.04805	0.35873	-0.05551	0.0044	0.02341	0.07289	-0.02945
2.98512	0	0.10002	0	0.00675	0.02184	0.05446	0.02126	0.02097				0.00974	-0.01814	0.20628	-0.06268	0.00444	0.01687	0.07028	-0.02292
3.0562	0.03035	0.08133	0.02025	0	0.00748	0.05054	0.01743	0.00663				0.00163	-0.01604	0.20691	-0.04031	-0.000242922	0.01762	0.07045	-0.01958
3.12727	0.00937	0.02716	0.00625	0.0791	0	0.16986	0.00945	0				-0.01127	-0.02403	0.16086	-0.02046	-0.00444	0.01632	0.07502	-0.02525
3.19835	0.01692	0.0014	0.06012	0.07128	0	0.02626	0	0				0.01339	-0.05492	0.04618	-0.04078	-0.00602	0.01522	0.08903	0.00452
3.26942	0.01022	0.06411	0.03631	0	0	0	0	0				0.01213	-0.05562	0.00356	-0.0433	0.01189	0.01569	0.10001	-0.00371
3.3405	0	0.05534	0	0	0.01031	0	0.01004	0				0.02016	-0.00924	0.00464	-0.01569	0.01394	0.01466	0.09934	-0.02196
3.41157	0.00995	0.01832	0.02001	0	0.00471	0.04357	0.00916	0				0.0162	-0.02532	-0.00866	-0.00627	0.00348	0.01537	0.08618	-0.02315
3.48265	0.01846	0	0.06473	0	0	0	0.000304214	0				0.00538	-0.03928	0.17195	-0.04624	0.00244	0.01983	0.06724	-0.02097
3.55372	0.01617	0.03206	0.06567	0	0	0	0	0.01048				0.02479	-0.04216	0.1505	0.02646	-0.00313	0.01886	0.07682	-0.02622
3.62479	0	0.04351	0.05218	0.02055	0.02073	0	0	0.00897				0.03967	-0.03616	0.1592	0.06764	0.000346119	0.0143	0.08214	-0.02924
3.69587	0.00281	0.04029	0.05956	0.07514	0.01319	0	0	0				0.0015	-0.03755	0.30566	-0.02001	0.0013	0.01505	0.07269	-0.02641
3.76694	0.00234	0.04434	0.02047	0.05843	0.00101	0.28857	0.00376	0				0.01182	-0.04199	-0.0017	-0.0293	-0.00379	0.01434	0.08014	-0.01881
3.83802	0.00707	0.01503	0.05543	0.04082	0.0089	0.51408	0	0				0.07343	-0.05762	0.03626	-0.0175	0.00667	0.01547	0.08193	0.00673
3.90909	0	0.02058	0.00586	0.03613	0	0	0	0				0.04808	-0.06046	-0.01522	-0.03466	0.02997	0.01632	0.07302	0.00203
3.98017	0	0	0.005	0.00867	0	0.07624	0.01199	0				0.00444	-0.05762	0.03349	-0.05151	0.01646	0.01411	0.091	0.04109
4.05124	0	0.00805	0.01249	0.01739	0	0.234	0.04451	0				0.01097	-0.05637	0.07787	-0.05674	-0.00694	0.01532	0.0686	-0.01577
4.12232	0.00445	0	0.05209	0.07541	0	0	0.01809	0				0.02578	-0.05983	-0.0206	-0.05275	-0.00266	0.01472	0.06757	-0.0129
4.19339	0.01943	0.00769	0	0.09109	0	0	0	0				0.0012	-0.05341	-0.01068	-0.05896	0.00431	0.01466	0.06795	-0.03192
4.26446	0.07001	0.06012	0	0.11344	0	0	0	0				-0.01614	-0.04642	0.02205	-0.05224	0.04532	0.01635	0.073	-0.0259
4.33554	0.02889	0	0	0	0.00492	0	0	0				9.13978e-05	-0.01456	0.03156	-0.06005	0.00357	0.01487	0.08286	-0.00513
4.40661	0	0	0.00177	0	0.04458	0	0.00161	0				0.01394	-0.03026	0.06801	-0.05604	0.03845	0.01426	0.07901	0.00259
4.47769	0.000918131	0	0.01496	0	0	0	0.03984	0				0.00954	-0.04882	-0.01244	-0.05873	-0.000297717	0.01416	0.07191	-0.02893
4.54876	0.04	0	0.05337	0	0	0	0.03666	0				0.07534	-0.05486	-0.02319	-0.06133	-0.01364	0.01453	0.06969	-0.02778
