# Supplementary material for: Tissue-specific targeting of DNA nanodevices in a multicellular living organism
Source: eLife. 2021 Jul 28;10:e67830. doi: 10.7554/eLife.67830 (PMC8360651; doi:10.7554/eLife.67830)
Supplement: Figure 4—figure supplement 2—source data 2. [file elife-67830-fig4-figsupp2-data2.xlsx]

## Sheet: Sheet1
rab3	1	2	3	4	5	6	7		nD647	1	2	3	4	5	6	7
X
0	0	0	0	0.02208	0	0.01081	0			0.15517	0.13216	0.06369	0.1697	0.24167	0.42857	0.05253
0.11329	0	0	0.04823	0.01611	0	0.00748	0.00659			0.15517	0.12335	0.06157	0.17576	0.26667	0.47619	0.05253
0.22658	0.00137	0	0.06592	0.02267	0	0.01247	0.02063			0.15517	0.12775	0.05945	0.1697	0.29167	0.48413	0.05253
0.33987	0.00657	0	0.03376	0.01551	0	0.0316	0.0106			0.16667	0.12775	0.08917	0.17576	0.26667	0.43651	0.05253
0.45317	0.01424	0.00217	0.00965	0.00119	0.00463	0.03465	0.01948			0.17816	0.12775	0.09979	0.18182	0.26667	0.4127	0.05657
0.56646	0.00685	0.00506	0.00161	0	0.0054	0.01192	0.01519			0.17241	0.12335	0.08493	0.17576	0.275	0.42857	0.06263
0.67975	0.00219	0.00253	0	0.02088	0.01389	0	0.00172			0.16667	0.11894	0.0913	0.18182	0.25833	0.43651	0.0596
0.79304	0.00603	0	0	0.03162	0.0216	0.01025	0.01719			0.16092	0.12335	0.07856	0.17576	0.25	0.43651	0.06465
0.90633	0.00301	0	0.08842	0.02804	0.01157	0.03187	0.01289			0.18391	0.12335	0.08068	0.1697	0.275	0.42063	0.07374
1.01962	0	0	0.08842	0.0179	0.01698	0.03908	0.02464			0.16667	0.11894	0.08068	0.2	0.25	0.45238	0.0697
1.13292	0.000273898	0	0.02412	0.02387	0.01003	0.01829	0.05272			0.16667	0.12335	0.07006	0.22424	0.225	0.49206	0.08081
1.24621	0.00904	0	0.11897	0.02088	0	0.00859	0.03209			0.22414	0.11894	0.06582	0.2	0.21667	0.46032	0.11818
1.3595	0.00603	0	0.12379	0.00537	0.0054	0.02938	0.02436			0.1954	0.12775	0.07431	0.18182	0.225	0.48413	0.11919
1.47279	0.03177	0.00686	0.24277	0.00179	0.02469	0.07677	0.0808			0.17241	0.15859	0.09554	0.21212	0.23333	0.64286	0.17475
1.58608	0.19419	0.07873	0.54502	0.05907	0.16435	0.16657	0.2851			0.27586	0.21586	0.16561	0.30303	0.24167	0.75397	0.32828
1.69937	0.48781	0.37342	0.95338	0.2315	0.28164	0.30626	0.56504			0.52874	0.39648	0.4586	0.53333	0.34167	0.83333	0.70404
1.81267	0.83813	0.78368	1	0.53998	0.74228	0.54906	1.00029			1	0.7533	0.83864	0.87273	0.46667	1.07937	1.00101
1.92596	1	1	0.79582	0.91647	1	0.66935	0.94011			0.92529	1	1	1	0.675	1.00794	0.83535
2.03925	0.86935	0.82521	0.73473	1	0.83179	0.44706	0.68883			0.54598	0.82379	0.8535	0.81818	1	0.87302	0.50505
2.15254	0.447	0.47382	0.65916	0.64439	0.53241	0.14329	0.55014			0.2931	0.45815	0.53715	0.49697	0.73333	0.80159	0.23939
2.26583	0.11504	0.17118	0.41318	0.27208	0.26312	0.04545	0.40172			0.17816	0.21586	0.28025	0.27273	0.49167	0.57143	0.10808
2.37912	0.02876	0.03395	0.16399	0.09129	0.09799	0.03076	0.25874			0.15517	0.14537	0.14225	0.18788	0.4	0.45238	0.08182
2.49241	0.03314	0.00686	0.0627	0.0179	0.0216	0.01912	0.16877			0.16667	0.13216	0.07856	0.17576	0.26667	0.42857	0.06667
2.60571	0.02356	0.013	0.08039	0.00597	0.00309	0.0485	0.11748			0.17241	0.12775	0.06157	0.1697	0.24167	0.42857	0.05556
2.719	0.00712	0.00795	0.0627	0.02208	0.01466	0.03686	0.05731			0.17241	0.12335	0.05945	0.17576	0.24167	0.48413	0.05556
2.83229	0.01534	0.00433	0.01447	0.05668	0.01852	0.02605	0.01232			0.17816	0.12335	0.05732	0.1697	0.24167	0.46825	0.05556
2.94558	0.01643	0.03286	0	0.06623	0.1034	0.01802	0.02751			0.17241	0.11894	0.0552	0.16364	0.23333	0.42857	0.05455
3.05887	0.0178	0.02203	0	0.07578	0.07176	0.03132	0.03209			0.16092	0.11454	0.05732	0.16364	0.225	0.42063	0.05354
3.17216	0.00959	0.00217	0.06913	0.03461	0.03395	0.03049	0.04011			0.15517	0.11454	0.05945	0.15758	0.25833	0.42063	0.05556
3.28546	0.01123	0.0195	0.1254	0.01014	0.04321	0.01053	0.02521			0.16667	0.11894	0.05732	0.16364	0.25833	0.42857	0.05657
3.39875	0.01233	0.02384	0.1045	0.0364	0.02623	0.00166	0.00831			0.16667	0.11894	0.05732	0.16364	0.23333	0.42857	0.05556
3.51204	0.01726	0.013	0.13183	0.01969	0.00694	0	0.01117			0.17241	0.11894	0.05732	0.16364	0.21667	0.42857	0.05556
3.62533	0.01616	0.00795	0.09003	0	0	0	0.00516			0.16667	0.11454	0.0552	0.16364	0.225	0.4127	0.05455
3.73862	0.00493	0.00289	0.08842	0.00298	0	0	0			0.15517	0.11894	0.05732	0.16364	0.23333	0.42063	0.05455
3.85191	0.00548	0	0.04823	0.02029	0.02006	0	0			0.15517	0.11894	0.05732	0.16364	0.24167	0.42857	0.05455
3.9652	0.00685	0.000361141	0.00322	0.01193	0.01775	0	0			0.15517	0.11894	0.05732	0.16364	0.225	0.42857	0.05455
4.0785	0.00411	0.01083	0	0	0.00309	0	0.000859599			0.15517	0.11894	0.05732	0	0.225	0.43651	0.05758
2.62975	0.05575	0.01243	0.50336	0	0.02605	1.00036	0.28582			0.1595	0.12433	0.06903	0.19619	0.43119	0.89575	0.06601
2.70083	0.04321	0.00102	0.07719	0.00112	0.01085	0.31973	0.07463			0.18314	0.12252	0.06811	0.17084	0.25088	0.76584	0.06697
2.7719	0.03007	0.01934	0.07222	0	0.00971	0.09323	0.06371			0.1713	0.12362	0.0619	0.18405	0.2704	0.713	0.06247
2.84298	0.00733	0.00362	0.24066	0.02993	0	0.01107	0.01533			0.18301	0.13835	0.06476	0.18579	0.46563	0.52381	0.05676
2.91405	0	0.00304	0.12734	0.01599	0	0	0			0.18482	0.19129	0.06075	0.17547	0.37597	0.46486	0.05584
2.98512	0	0	0.01256	0.03703	0.0129	0.03441	0.03856			0.16608	0.16241	0.05653	0.17552	0.27095	0.44816	0.05868
3.0562	0.02224	0.01466	0	0.01269	0.01197	0.02821	0.01219			0.16175	0.16253	0.06969	0.1693	0.283	0.4493	0.06015
3.12727	0.00687	0.00453	0.14714	0	0.04024	0.01529	0			0.15486	0.15381	0.08136	0.16373	0.26204	0.47843	0.05767
3.19835	0.0124	0.04353	0.1326	0	0.00622	0	0			0.16804	0.13208	0.06941	0.16164	0.24442	0.56775	0.07066
3.26942	0.00749	0.02629	0	0	0	0	0			0.16736	0.12401	0.06793	0.18541	0.252	0.63781	0.06707
3.3405	0	0	0	0.01749	0	0.01625	0			0.17165	0.12421	0.08417	0.18813	0.23549	0.63349	0.05911
3.41157	0.00729	0.01449	0	0.00798	0.01032	0.01483	0			0.16954	0.1217	0.0897	0.17424	0.24688	0.5496	0.05859
3.48265	0.01352	0.04687	0	0	0	0.000492239	0			0.16376	0.15591	0.0662	0.17287	0.3185	0.42883	0.05954
3.55372	0.01185	0.04755	0	0	0	0	0.01928			0.17413	0.15184	0.10896	0.16547	0.30278	0.48989	0.05725
3.62479	0	0.03779	0.03822	0.03515	0	0	0.0165			0.18208	0.15349	0.13317	0.17008	0.22956	0.52384	0.05593
3.69587	0.00206	0.04313	0.13977	0.02237	0	0	0			0.16168	0.18124	0.08162	0.17135	0.24173	0.46354	0.05717
3.76694	0.00171	0.01483	0.10869	0.00171	0.06836	0.00608	0			0.16719	0.12301	0.07616	0.1646	0.23027	0.51105	0.06048
3.83802	0.00518	0.04014	0.07593	0.01509	0.12178	0	0			0.20013	0.13021	0.0831	0.17848	0.24845	0.52251	0.07163
3.90909	0	0.00425	0.0672	0	0	0	0			0.18658	0.12045	0.07301	0.2094	0.26209	0.46568	0.06957
3.98017	0	0.00362	0.01613	0	0.01806	0.0194	0			0.16325	0.12968	0.0631	0.19148	0.22657	0.58035	0.08662
4.05124	0	0.00904	0.03234	0	0.05543	0.07202	0			0.16674	0.13809	0.06002	0.16042	0.24609	0.43749	0.06181
4.12232	0.00326	0.03771	0.14026	0	0	0.02927	0			0.17466	0.11943	0.06237	0.1661	0.23643	0.43089	0.06306
4.19339	0.01424	0	0.16944	0	0	0	0			0.16152	0.12131	0.05872	0.17535	0.23538	0.43332	0.05476
4.26446	0.05129	0	0.21101	0	0	0	0			0.15225	0.12751	0.06267	0.22978	0.26257	0.46552	0.05739
4.33554	0.02116	0	0	0.00835	0	0	0			0.16093	0.12931	0.05807	0.17437	0.23872	0.5284	0.06645
4.40661	0	0.00128	0	0.0756	0	0.0026	0			0.16833	0.13622	0.06044	0.22065	0.22894	0.50384	0.06982
4.47769	0.000672692	0.01083	0	0	0	0.06446	0			0.16598	0.12098	0.05885	0.16923	0.22733	0.4586	0.05606
4.54876	0.02931	0.03864	0	0	0	0.05931	0			0.20115	0.11894	0.05732	0.15152	0.23333	0.44444	0.05657
