# Supplementary material for: Tissue-specific targeting of DNA nanodevices in a multicellular living organism
Source: eLife. 2021 Jul 28;10:e67830. doi: 10.7554/eLife.67830 (PMC8360651; doi:10.7554/eLife.67830)
Supplement: Figure 5—source data 1. [file elife-67830-fig5-data1.xlsx]

## Sheet: Sheet1
	O											R
X	1	2	3	4	5	6	7	8	9	10		1	2	3	4	5	6	7	8	9	10
0	0	0	0	0	0	0	0	0	0	0		0	0	0	0	0	0	0	0	0	0
0.267	8.594	8.13	0	0	0	0	17	1.974	0	0		0	7.24	0	0	17.775	0	0	18.397	0	0
0.534	159.824	124.232	148.285	58.775	86.876	42.331	34.843	8.961	93.535	29.48		7.687	135.423	11.113	154.455	89.306	50.633	63.187	0.303	5.441	14.703
0.801	205	177.342	268.134	201.157	197.39	198.295	162.076	136.866	204.901	144.964		101.235	220.133	144.597	280	196.764	245.366	258.021	169.359	116.658	181.2
1.06801	163.611	217.438	273.429	233.844	217.443	236.755	200.701	193.122	204.392	173.125		176.273	183.637	223.562	285	244.892	240.156	240.101	197.631	183.385	207.505
1.33501	13.5	165.55	183.513	173.074	128.635	128.891	150.471	132.18	91.985	172.542		165.26	16.167	145.993	167.958	187.102	123.117	170.304	117.721	125.571	44.382
1.60201	0	77.977	13.371	20.578	5.046	14.047	1.337	3.966	0	55.143		61.827	0	6.36	13.279	22.449	6.667	17.1	0	3.768	0
1.86901	--	0	0	0	0	0	0	0	0	0		0		0	0	0	0	0	0	0	0
2.13601	--	0	--		--	--	--	--	--	--		--		0	--		--	--	--	--	--
--	--	--	--	--	--	--	--	--	--	--		--			--	--	--	--	--	--	--
