# Supplementary material for: Tissue-specific targeting of DNA nanodevices in a multicellular living organism
Source: eLife. 2021 Jul 28;10:e67830. doi: 10.7554/eLife.67830 (PMC8360651; doi:10.7554/eLife.67830)
Supplement: Figure 5—source data 2. [file elife-67830-fig5-data2.xlsx]

## Sheet: Sheet1
	O											R
X	1	2	3	4	5	6	7	8	9			1	2	3	4	5	6	7	8	9
0	26.7081	20.7269	10.2464	23.0071	25.6265	22.1714	6.87422	6.59997	12.2417	--	--	0.0966	0.0839	0.0623	0.1573	8.135	0.7021	0.0753	2.1943	2.8316
0.267	49.7589	22.3277	25.975	30.4428	54.3524	30.773	13.8925	30.4141	35.9307	--	--	0.1534	0.0881	0.1049	5.5474	30.763	8.8337	2.0908	14.584	19.6737
0.534	69.8518	50.7681	49.2416	58.0767	106.995	58.8829	46.8144	71.2682	85.3492	--	--	27.4074	0.1616	18.5845	33.256	72.342	29.3074	19.6202	43.7728	59.1228
0.801	91.136	81.112	85.0934	105.431	175.732	95.9099	78.4278	129.893	145.172	--	--	66.0659	50.7871	66.2803	65.6356	111.924	54.5401	44.0971	71.1485	99.2558
1.06801	86.2102	118.878	124.471	105.836	186.503	97.446	89.0349	117.298	117.964	--	--	63.546	86.8224	91.6776	75.7616	124.799	69.4758	61.2282	82.0455	98.1298
1.33501	69.6578	115.659	89.7687	70.0545	137.715	61.7638	69.3668	72.547	64.8402	--	--	25.9678	76.9144	71.3971	53.5627	110.707	50.5102	59.834	65.9184	56.0543
1.60201	49.2647	66.0841	65.0391	69.5202	103.87	46.1	53.6048	47.5757	34.0224	--	--	0.1584	0.2043	53.6518	18.775	67.929	28.5047	29.0128	28.1012	17.8774
1.86901	34.9927	28.5742	30.4799	20.269	58.5854	25.9643	23.2722	23.8504	--	--	--	0.1263	0.1104	3.8935	7.9264	29.401	9.7852	9.0328	7.1686	--
2.13601	44.2292	26.1938	12.8764	--	15.5119	11.2657	-0.79747	--	--	--	--	0.1518	0.1046	0.0718	--	8.594	0.0946	0.069	--	--
--	--	--	--	--	--	--	--	--	--	--	--			--	--	--	--	--	--	--
		--
		--
		--
