# Supplementary material for: Tissue-specific targeting of DNA nanodevices in a multicellular living organism
Source: eLife. 2021 Jul 28;10:e67830. doi: 10.7554/eLife.67830 (PMC8360651; doi:10.7554/eLife.67830)
Supplement: Figure 5—source data 3. [file elife-67830-fig5-data3.xlsx]

## Sheet: Sheet1
ODR	snb	Coelomocytes		ODR	snb	Coelomocytes		ODR	snb	Coelomocytes			ODR	snb	Coelomocytes
N=1				N=2				N=3				Avg
0.33849	0.38998	0.5198		0.35359	0.43636	0.48443		0.26831	0.38996	0.47811		N=1	0.30855	0.44495	0.48398
0.29179	0.40982	0.50051		0.37897	0.46772	0.42325		0.2674	0.51573	0.47963		N=2	0.32231	0.46421	0.46084
0.33504	0.41505	0.51764		0.31265	0.51224	0.52315		0.25297	0.45382	0.43874		N=3	0.27916	0.44173	0.46475
0.28216	0.47352	0.49539		0.31817	0.49334	0.45737		0.29606	0.40889	0.46504
0.31123	0.44122	0.51836		0.36346	0.50472	0.45126		0.27186	0.50282	0.47706
0.30145	0.45395	0.44753		0.29415	0.45421	0.45444		0.27077	0.45736	0.51783
0.26185	0.39833	0.449		0.28856	0.4467	0.45843		0.31871	0.38454	0.40396
0.3001	0.46443	0.44864		0.30584	0.46442	0.43436		0.28719	0.42075	0.4496
0.34608	0.44274	0.50863		0.25091	0.43996	--		--		0.46513
0.31727	0.50238	0.45468		0.35682	0.46795	--		--		0.48918
--	0.45174	0.46267			0.41868	--		--	--	0.42281
	0.49622	0.48498				--		--	--	0.48996
--	--			--		--		--	--
--	--	--		--		--		--	--	--
--	--	--		--	--			--	--	--
--	--	--
--	--	--
--	--
--	--	--
								--	--	--
								--	--	--
								--	--	--
								--	--	--
								--	--	--
								--	--	--
								--	--	--
								--	--	--
								--	--	--
								--	--	--
								--	--	--
								--	--	--
								--	--	--
								--	--	--
								--	--	--
								--	--	--
								--	--	--
								--	--	--
								--	--	--
								--	--	--
								--	--	--
								--	--	--
								--	--	--
								--	--	--
								--	--	--
								--	--	--
								--	--	--
								--	--	--
								--	--	--
								--	--	--
								--	--	--
								--	--	--
								--	--	--
								--	--	--
								--	--	--
								--	--	--
								--	--	--
								--	--	--
								--	--	--
								--	--	--
								--	--	--
								--	--	--
								--	--	--
								--	--	--
								--	--	--
								--	--	--
								--	--	--
								--	--	--
								--	--	--
								--	--	--
								--	--	--
								--	--	--
								--	--	--
								--	--	--
								--	--	--
								--	--	--
								--	--	--
								--	--	--
								--	--	--
								--	--	--
								--	--	--
								--	--	--
								--	--	--
								--	--	--
								--	--	--
								--	--	--
