# Supplementary material for: Tissue-specific targeting of DNA nanodevices in a multicellular living organism
Source: eLife. 2021 Jul 28;10:e67830. doi: 10.7554/eLife.67830 (PMC8360651; doi:10.7554/eLife.67830)
Supplement: Figure 5—source data 4. [file elife-67830-fig5-data4.xlsx]

## Sheet: Sheet1
	ODR-2	SNB-1
1	0.93126	1.35666
2	0.97261	1.50374
3	0.81525	1.35771
4	1.04725	1.39696
5	0.90563	1.49442
6	0.98584	1.40259
7	1.01553	1.45415
8	1.0531	1.42967
9	0.985	1.46261
10	0.98214
