# Supplementary material for: Tissue-specific targeting of DNA nanodevices in a multicellular living organism
Source: eLife. 2021 Jul 28;10:e67830. doi: 10.7554/eLife.67830 (PMC8360651; doi:10.7554/eLife.67830)
Supplement: Figure 5—source data 5. [file elife-67830-fig5-data5.xlsx]

## Sheet: Sheet1
Calibration plot		O/R					O/R
	4.5	1	0.02362			--	--	--
	5	0.98106	0.02441		Coelomocytes	5.5	0.99671	0.03204
	5.5	0.99671	0.01024			--	--	--
	6	0.97818	0.01925		odr-2	7.19	0.65	0.03239
	6.5	0.90655	0.01508			--	--	--
	7	0.68753	0.01181		snb-1	5.595	0.992	0.03216
	7.5	0.50638	0.00118			--	--	--
	8	0.38576	0.00634
